# Supplementary material for: Tetrachloroplatinate(ii) anion as a square-planar tecton for crystal engineering involving halogen bonding
Source: Royal Society of Chemistry journal article supplement (doi:10.1039/d0ce00576b), 2020-01-01
Supplement: d0ce00576b1.pdf [file d0ce00576b1.pdf]

## Electronic Supporting Information

### **Tetrachloroplatinate(II) Anion as a Square-planar Tecton for XB- Involving Crystal Engineering**

Vitalii V. Suslonov,<sup>1</sup> Anastasiya A. Eliseeva,<sup>1</sup> Alexander S. Novikov,<sup>1</sup> Daniil M. Ivanov,<sup>1</sup>  
Alexey Yu. Dubovtsev,<sup>1</sup> Nadezhda A. Bokach\*,<sup>1</sup> and Vadim Yu. Kukushkin<sup>1,2</sup>

*<sup>1</sup>Institute of Chemistry, Saint Petersburg State University, Universitetskaya nab. 7/9, Saint  
Petersburg, 199034, Russian Federation*

*<sup>2</sup>South Ural State University, 76, Lenin Av., Chelyabinsk, 454080, Russian Federation*

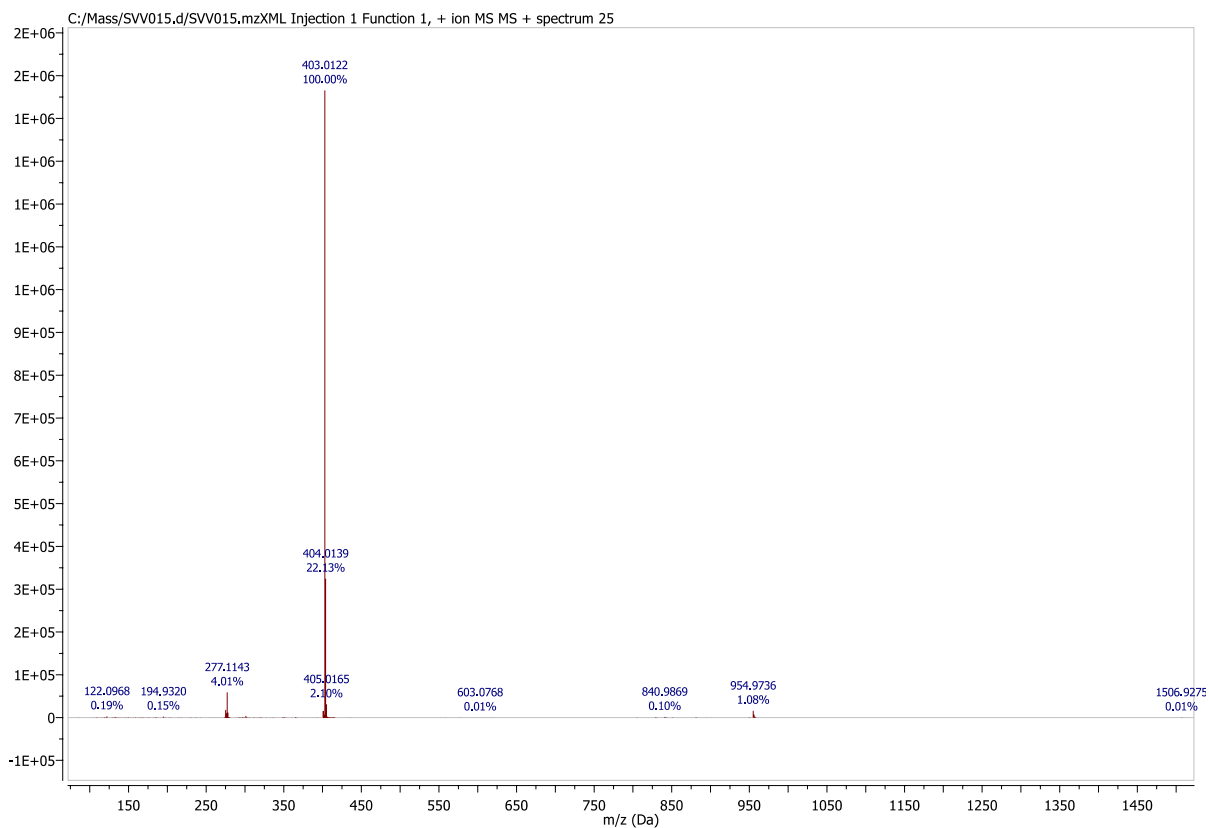

**Figure S1.** HRESI-MS<sup>+</sup> spectrum of [Ph<sub>3</sub>PCH<sub>2</sub>I](CF<sub>3</sub>SO<sub>3</sub>).

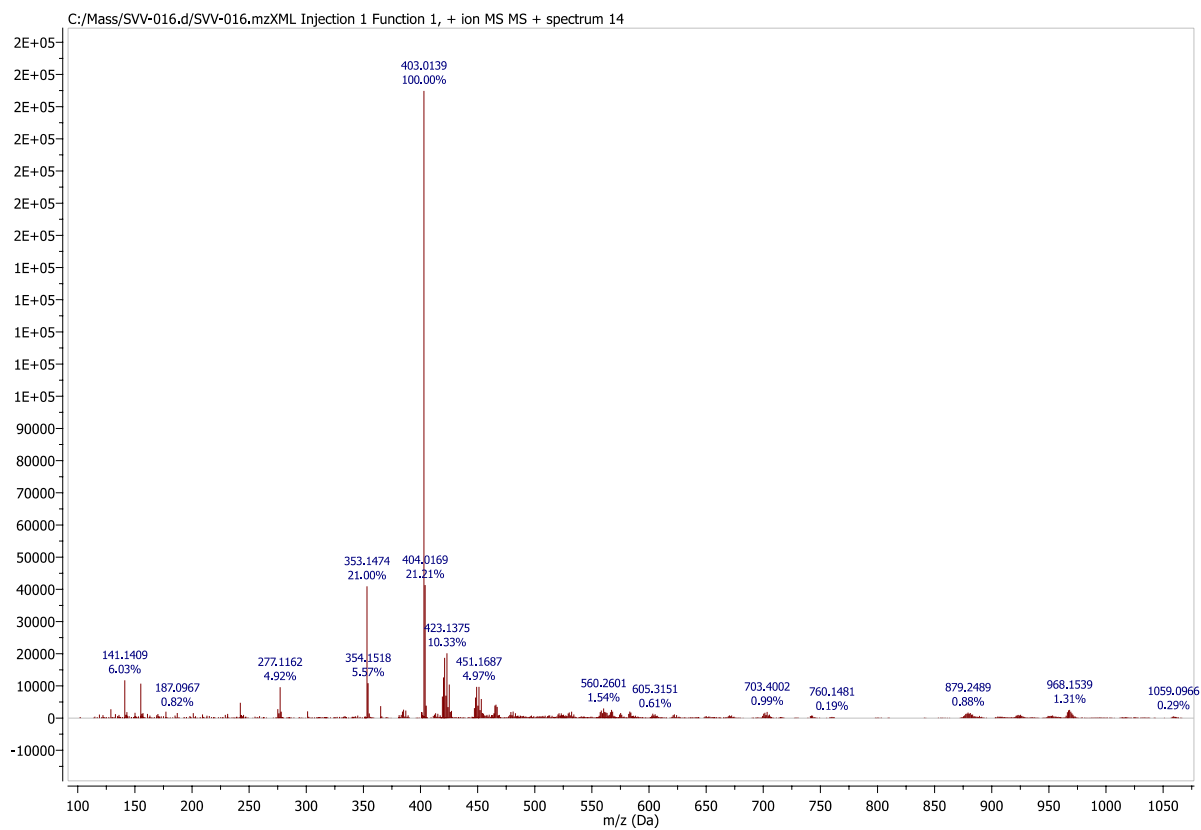

**Figure S2.** HRESI-MS<sup>+</sup> spectrum of **2**.

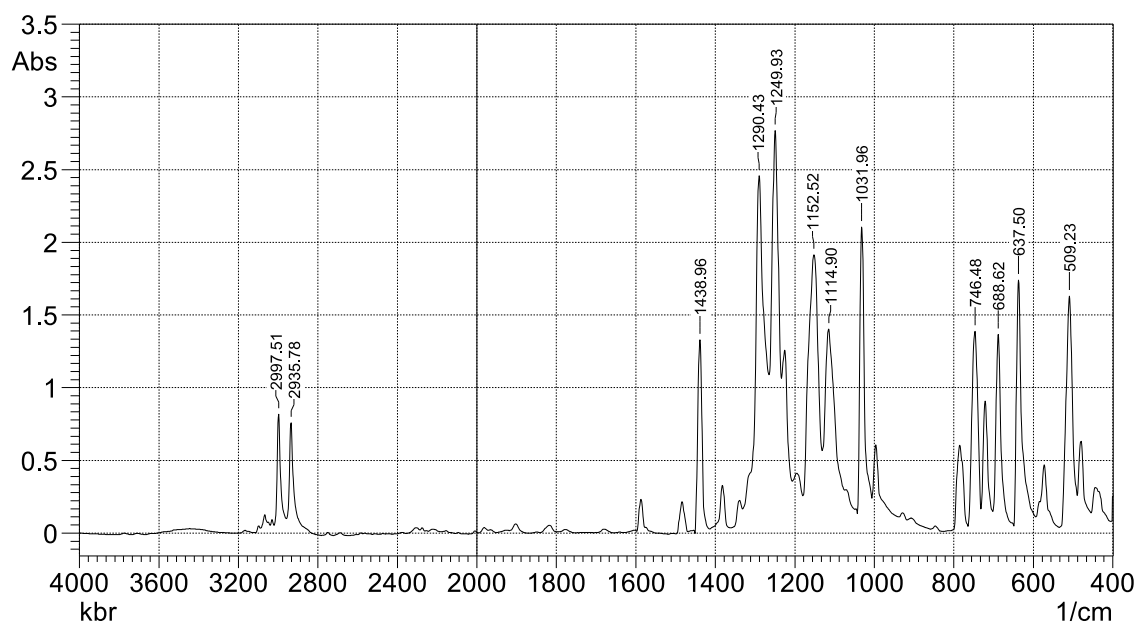

Comment;  
kbr

No. of Scans;  
Resolution;  
Apodization;

Date/Time: 26.02.2020 9:37:01  
Григорьев Я.М.; User

**Figure S3.** IR spectrum of  $[\text{Ph}_3\text{PCH}_2\text{I}](\text{CF}_3\text{SO}_3)$ .

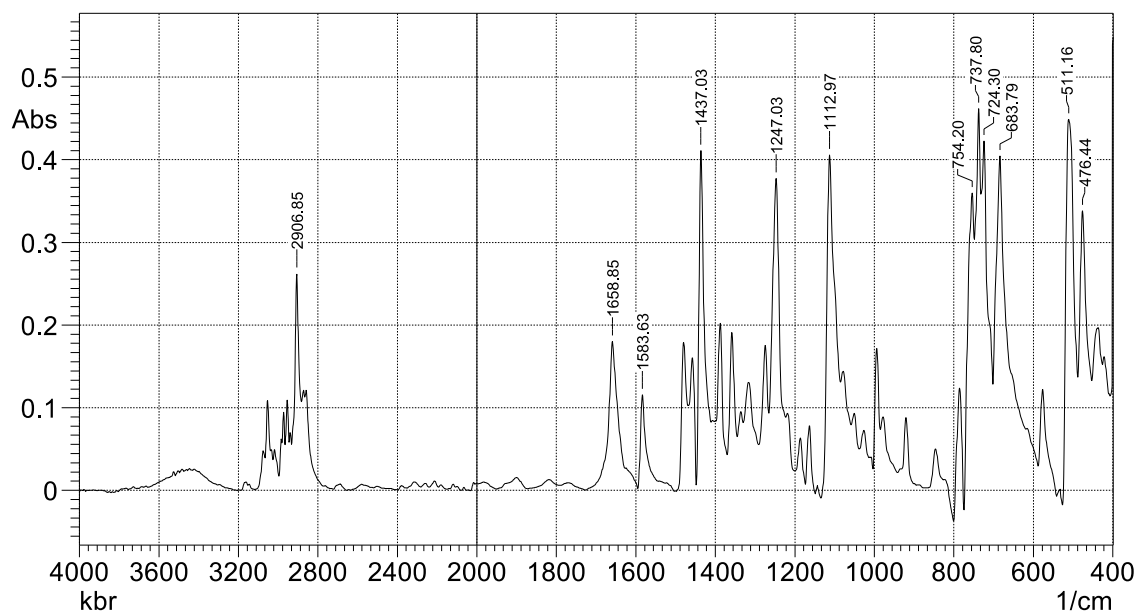

Comment;  
kbr

No. of Scans;  
Resolution;  
Apodization;

Date/Time: 19.03.2020 15:33:40  
Григорьев Я.М.; User

**Figure S4.** IR spectrum of  $[\text{Ph}_3\text{PCH}_2\text{I}](\text{CF}_3\text{SO}_3)$ .

**Table S1.** Crystal data and structure refinement for [Ph<sub>3</sub>PCH<sub>2</sub>I](CF<sub>3</sub>SO<sub>3</sub>), **2**, and **1**·FIB.

| Sample                                                       | [Ph <sub>3</sub> PCH <sub>2</sub> I](CF <sub>3</sub> SO <sub>3</sub> )       | <b>2</b>                                                                         | <b>1</b> ·FIB                                                                                                  |
|--------------------------------------------------------------|------------------------------------------------------------------------------|----------------------------------------------------------------------------------|----------------------------------------------------------------------------------------------------------------|
| Identification code                                          | 10622-13266_SVV015                                                           | 10622-13309_SVV016_MeNO2                                                         | EAA028                                                                                                         |
| Empirical formula                                            | C <sub>20</sub> H <sub>17</sub> F <sub>3</sub> IO <sub>3</sub> PS            | C <sub>38</sub> H <sub>34</sub> Cl <sub>4</sub> I <sub>2</sub> P <sub>2</sub> Pt | C <sub>78</sub> H <sub>60</sub> Cl <sub>4</sub> F <sub>4</sub> I <sub>2</sub> N <sub>2</sub> P <sub>4</sub> Pt |
| Formula weight                                               | 552.26                                                                       | 1143.28                                                                          | 1815.85                                                                                                        |
| Temperature/K                                                | 100(2)                                                                       | 100(2)                                                                           | 100(2)                                                                                                         |
| Crystal system                                               | monoclinic                                                                   | monoclinic                                                                       | triclinic                                                                                                      |
| Space group                                                  | <i>P</i> 2 <sub>1</sub> / <i>n</i>                                           | <i>P</i> 2 <sub>1</sub> / <i>c</i>                                               | <i>P</i> -1                                                                                                    |
| <i>a</i> /Å                                                  | 10.4024(3)                                                                   | 18.3265(6)                                                                       | 10.8208(5)                                                                                                     |
| <i>b</i> /Å                                                  | 15.8557(5)                                                                   | 13.0690(3)                                                                       | 12.0593(6)                                                                                                     |
| <i>c</i> /Å                                                  | 12.7928(4)                                                                   | 18.5735(6)                                                                       | 14.2648(7)                                                                                                     |
| $\alpha$ /°                                                  | 90                                                                           | 90                                                                               | 109.418(4)                                                                                                     |
| $\beta$ /°                                                   | 97.894(2)                                                                    | 119.538(4)                                                                       | 92.227(4)                                                                                                      |
| $\gamma$ /°                                                  | 90                                                                           | 90                                                                               | 97.782(4)                                                                                                      |
| Volume/Å <sup>3</sup>                                        | 2090.02(10)                                                                  | 3870.3(2)                                                                        | 1732.36(15)                                                                                                    |
| <i>Z</i>                                                     | 4                                                                            | 4                                                                                | 1                                                                                                              |
| $\rho_{\text{calc}}$ /cm <sup>3</sup>                        | 1.755                                                                        | 1.962                                                                            | 1.741                                                                                                          |
| $\mu$ /mm <sup>-1</sup>                                      | 1.754                                                                        | 5.607                                                                            | 3.221                                                                                                          |
| F(000)                                                       | 1088.0                                                                       | 2176.0                                                                           | 890.0                                                                                                          |
| Crystal size/mm <sup>3</sup>                                 | 0.2 × 0.2 × 0.15                                                             | 0.2 × 0.2 × 0.2                                                                  | 0.2 × 0.15 × 0.15                                                                                              |
| Radiation                                                    | MoK $\alpha$ ( $\lambda$ = 0.71073)                                          | MoK $\alpha$ ( $\lambda$ = 0.71073)                                              | MoK $\alpha$ ( $\lambda$ = 0.71073)                                                                            |
| 2 $\theta$ range for data collection/°                       | 6.006 to 54.996                                                              | 5.43 to 55                                                                       | 5.212 to 62.824                                                                                                |
| Index ranges                                                 | -12 ≤ <i>h</i> ≤ 13, -18 ≤ <i>k</i> ≤ 20, -16 ≤ <i>l</i> ≤ 9                 | -21 ≤ <i>h</i> ≤ 23, -16 ≤ <i>k</i> ≤ 15, -24 ≤ <i>l</i> ≤ 22                    | -14 ≤ <i>h</i> ≤ 14, -17 ≤ <i>k</i> ≤ 17, -20 ≤ <i>l</i> ≤ 20                                                  |
| Reflections collected                                        | 10364                                                                        | 16758                                                                            | 18135                                                                                                          |
| Independent reflections                                      | 4806 [ <i>R</i> <sub>int</sub> = 0.0244, <i>R</i> <sub>sigma</sub> = 0.0351] | 8873 [ <i>R</i> <sub>int</sub> = 0.0304, <i>R</i> <sub>sigma</sub> = 0.0504]     | 10013 [ <i>R</i> <sub>int</sub> = 0.0297, <i>R</i> <sub>sigma</sub> = 0.0518]                                  |
| Data/restraints/parameters                                   | 4806/0/262                                                                   | 8873/0/424                                                                       | 10013/0/430                                                                                                    |
| Goodness-of-fit on F <sup>2</sup>                            | 1.069                                                                        | 1.182                                                                            | 1.045                                                                                                          |
| Final <i>R</i> indexes [ <i>I</i> ≥ 2 $\sigma$ ( <i>I</i> )] | <i>R</i> <sub>1</sub> = 0.0258, <i>wR</i> <sub>2</sub> = 0.0562              | <i>R</i> <sub>1</sub> = 0.0456, <i>wR</i> <sub>2</sub> = 0.0944                  | <i>R</i> <sub>1</sub> = 0.0308, <i>wR</i> <sub>2</sub> = 0.0663                                                |
| Final <i>R</i> indexes [all data]                            | <i>R</i> <sub>1</sub> = 0.0320, <i>wR</i> <sub>2</sub> = 0.0591              | <i>R</i> <sub>1</sub> = 0.0534, <i>wR</i> <sub>2</sub> = 0.0976                  | <i>R</i> <sub>1</sub> = 0.0378, <i>wR</i> <sub>2</sub> = 0.0708                                                |
| Largest diff. peak/hole / e Å <sup>-3</sup>                  | 0.44/-0.55                                                                   | 2.87/-1.64                                                                       | 1.60/-1.74                                                                                                     |
| CCDC number                                                  | 1989400                                                                      | 1989401                                                                          | 1989402                                                                                                        |

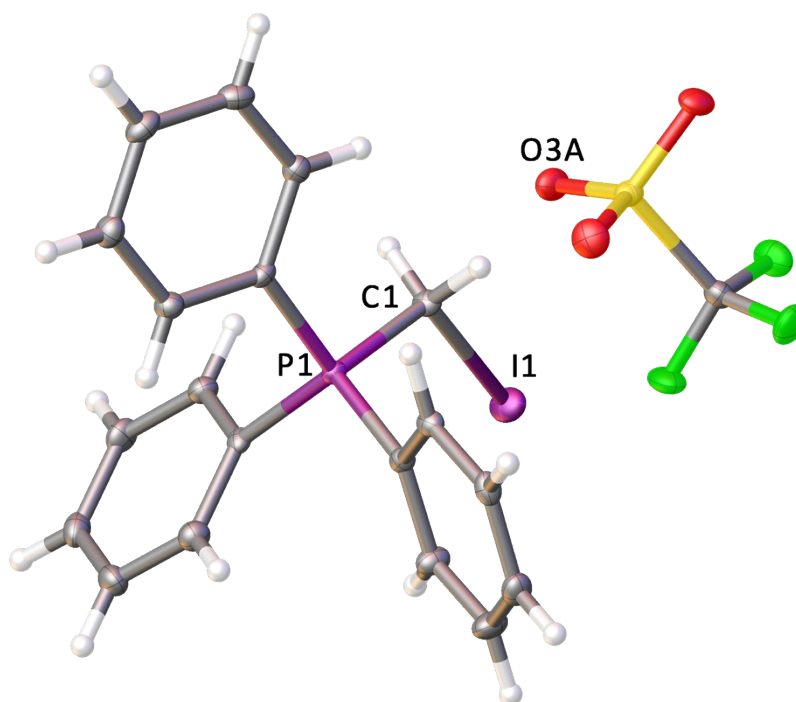

**Figure S5.** View of the molecular structure of  $[\text{Ph}_3\text{PCH}_2\text{I}](\text{CF}_3\text{SO}_3)$ .

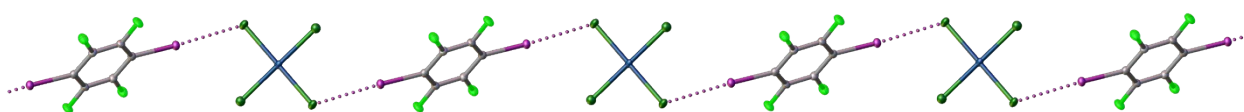

**Fig. S6.** The 1D chain formed by  $[\text{PtCl}_4]^{2-}$  and FIB; the contacts shorter than  $\Sigma R_{\text{vdw}}$  are represented by dotted lines. Thermal ellipsoids are shown with the 50% probability.

**Table S2.** Distribution of electron density  $\rho(\mathbf{r})$  and electrostatic potential ESP along the bond path for contacts I $\cdots$ Cl in **1**·FIB and **2**.

| System                                                                                  | <b>1</b> ·FIB      |                     | <b>2</b>                 |
|-----------------------------------------------------------------------------------------|--------------------|---------------------|--------------------------|
| Contact I $\cdots$ Cl                                                                   | Type I,<br>3.743 Å | Type II,<br>3.091 Å | Type I or II,<br>3.489 Å |
| Position of $\rho(\mathbf{r})_{\max}(\text{I})$ , Å                                     | 0.796              | 0.795               | 0.795                    |
| Position of $\rho(\mathbf{r})_{\min}$ , Å                                               | 2.747              | 2.354               | 2.603                    |
| Position of $\rho(\mathbf{r})_{\max}(\text{Cl})$ , Å                                    | 4.538              | 3.887               | 4.285                    |
| Distance between $\rho(\mathbf{r})_{\max}(\text{I})$ and $\rho(\mathbf{r})_{\min}$ , Å  | 1.951              | 1.559               | 1.808                    |
| Distance between $\rho(\mathbf{r})_{\max}(\text{Cl})$ and $\rho(\mathbf{r})_{\min}$ , Å | 1.791              | 1.533               | 1.682                    |
| Value of $\rho(\mathbf{r})_{\max}(\text{I})$ , a.u.                                     | 245620.090         | 439813.690          | 461651.540               |
| Value of $\rho(\mathbf{r})_{\min}$ , a.u.                                               | 0.008              | 0.023               | 0.010                    |
| Value of $\rho(\mathbf{r})_{\max}(\text{Cl})$ , a.u.                                    | 3897.851           | 3982.246            | 3984.531                 |
| Position of $\text{ESP}_{\max}(\text{I})$ , Å                                           | 0.800              | 0.805               | 0.802                    |
| Position of $\text{ESP}_{\min}$ , Å                                                     | 3.007              | 2.573               | 2.823                    |
| Position of $\text{ESP}_{\max}(\text{Cl})$ , Å                                          | 4.552              | 3.893               | 4.295                    |
| Distance between $\text{ESP}_{\max}(\text{I})$ and $\text{ESP}_{\min}$ , Å              | 2.207              | 1.768               | 2.021                    |
| Distance between $\text{ESP}_{\max}(\text{Cl})$ and $\text{ESP}_{\min}$ , Å             | 1.545              | 1.320               | 1.472                    |
| Value of $\text{ESP}_{\max}(\text{I})$ , a.u.                                           | 5503.339           | 16578.570           | 15687.031                |
| Value of $\text{ESP}_{\min}$ , a.u.                                                     | -0.296             | -0.171              | -0.118                   |
| Value of $\text{ESP}_{\max}(\text{Cl})$ , a.u.                                          | 1800.527           | 5357.494            | 5071.459                 |

**Table S3.** Cartesian atomic coordinates for model supramolecular associates.

| Atom         | X         | Y        | Z         |
|--------------|-----------|----------|-----------|
| <b>1·FIB</b> |           |          |           |
| Pt           | 8.633607  | 7.085965 | 13.399087 |
| Cl           | 7.839677  | 7.749003 | 11.349027 |
| Cl           | 10.565030 | 6.225891 | 12.467717 |
| Cl           | 9.427537  | 6.422926 | 15.449148 |
| Cl           | 6.702184  | 7.946038 | 14.330458 |
| I            | 8.978019  | 5.975938 | 9.086859  |
| F            | 7.160946  | 3.865320 | 7.517826  |
| F            | 7.739285  | 1.961270 | 5.754908  |
| C            | 9.419114  | 4.565291 | 7.622741  |
| C            | 8.445279  | 3.717911 | 7.122955  |
| C            | 8.742817  | 2.725084 | 6.223876  |
| I            | 10.476388 | 1.110026 | 4.312228  |
| F            | 12.293461 | 3.220644 | 5.881261  |
| F            | 11.715122 | 5.124695 | 7.644179  |
| C            | 10.035293 | 2.520673 | 5.776347  |
| C            | 11.009128 | 3.368054 | 6.276133  |
| C            | 10.711590 | 4.360881 | 7.175211  |
| <b>2</b>     |           |          |           |
| Pt           | 4.474065  | 5.483752 | 0.041691  |
| Cl           | 3.708586  | 7.171483 | 1.454677  |
| Cl           | 5.592840  | 7.068238 | -1.241533 |
| Cl           | 3.419450  | 3.906324 | 1.365638  |

|    |           |           |           |
|----|-----------|-----------|-----------|
| Cl | 5.167245  | 3.777072  | -1.374041 |
| I  | 1.091715  | 1.704328  | 2.747435  |
| P  | -1.637891 | -0.041167 | 3.288939  |
| C  | -4.243706 | -0.650836 | 4.044718  |
| H  | -4.477738 | -0.551512 | 3.128476  |
| C  | -5.193563 | -1.032451 | 4.970657  |
| H  | -6.087094 | -1.197120 | 4.687866  |
| C  | -1.080595 | -3.707675 | 1.661195  |
| H  | -1.558233 | -4.293167 | 1.084301  |
| C  | -4.868648 | -1.177517 | 6.302198  |
| H  | -5.531816 | -1.446738 | 6.925954  |
| C  | -3.565460 | -0.931820 | 6.735272  |
| H  | -3.342423 | -1.021996 | 7.654747  |
| C  | -2.312958 | 0.857326  | 1.895507  |
| C  | -0.443689 | 1.021996  | 4.088349  |
| H  | -0.022795 | 0.527988  | 4.836533  |
| H  | -0.911778 | 1.806136  | 4.468097  |
| C  | -1.589030 | -2.462200 | 1.973073  |
| H  | -2.427611 | -2.191671 | 1.615948  |
| C  | -2.329475 | 1.421907  | -0.439538 |
| H  | -2.102588 | 1.216724  | -1.338005 |
| C  | -2.937771 | -0.414287 | 4.472945  |
| C  | -2.594526 | -0.554126 | 5.814182  |
| H  | -1.701911 | -0.392070 | 6.098589  |
| C  | -1.926795 | 0.565888  | 0.586589  |



|   |           |           |           |
|---|-----------|-----------|-----------|
| H | -1.399985 | -0.199956 | 0.397523  |
| C | -3.056906 | 2.007398  | 2.163755  |
| H | -3.306703 | 2.208661  | 3.057374  |
| C | 0.322988  | -2.013933 | 3.375716  |
| H | 0.791470  | -1.441511 | 3.972001  |
| C | -0.885875 | -1.600952 | 2.802054  |
| C | 0.151165  | -4.097132 | 2.207385  |
| H | 0.517606  | -4.945310 | 1.984384  |
| C | -3.426594 | 2.849042  | 1.147323  |
| H | -3.935079 | 3.629261  | 1.333157  |
| C | -3.048679 | 2.551069  | -0.163211 |
| H | -3.293622 | 3.137867  | -0.869380 |
| C | 0.827757  | -3.265943 | 3.060606  |
| H | 1.651686  | -3.550847 | 3.440354  |
